# Supplementary material for: An ammonium rich pillararene macrocycle as a heterogeneous catalyst for cyclic carbonate synthesis
Source: Royal Society of Chemistry journal article supplement (doi:10.1039/d4ya00620h), 2025-01-01
Supplement: d4ya00620h1.pdf [file d4ya00620h1.pdf]

## Electronic Supplementary Information (ESI)

### Ammonium Rich Pillararene Macrocycle as a Heterogeneous Catalyst for Cyclic Carbonates Synthesis

**Khaleel I. Assaf,<sup>\*,a</sup> Feda'a M. Al-Qaisi,<sup>\*,b</sup> Ala'a F. Eftaiha,<sup>b</sup> Abdussalam K. Qaroush,<sup>c</sup>  
Ahmad M. Ala'mar<sup>b</sup> and Majd M. Al-Fararjeh<sup>b</sup>**

<sup>a</sup> Department of Chemistry, Faculty of Science, Al-Balqa Applied University, Al-Salt 19117, Jordan.

<sup>b</sup> Department of Chemistry, Faculty of Science, The Hashemite University, Zarqa 13133, Jordan.

<sup>c</sup> Department of Chemistry, Faculty of Science, The University of Jordan, 11942 Amman, Jordan.

Emails: [khaleel.assaf@bau.edu.jo](mailto:khaleel.assaf@bau.edu.jo); [fedaam@hu.edu.jo](mailto:fedaam@hu.edu.jo)

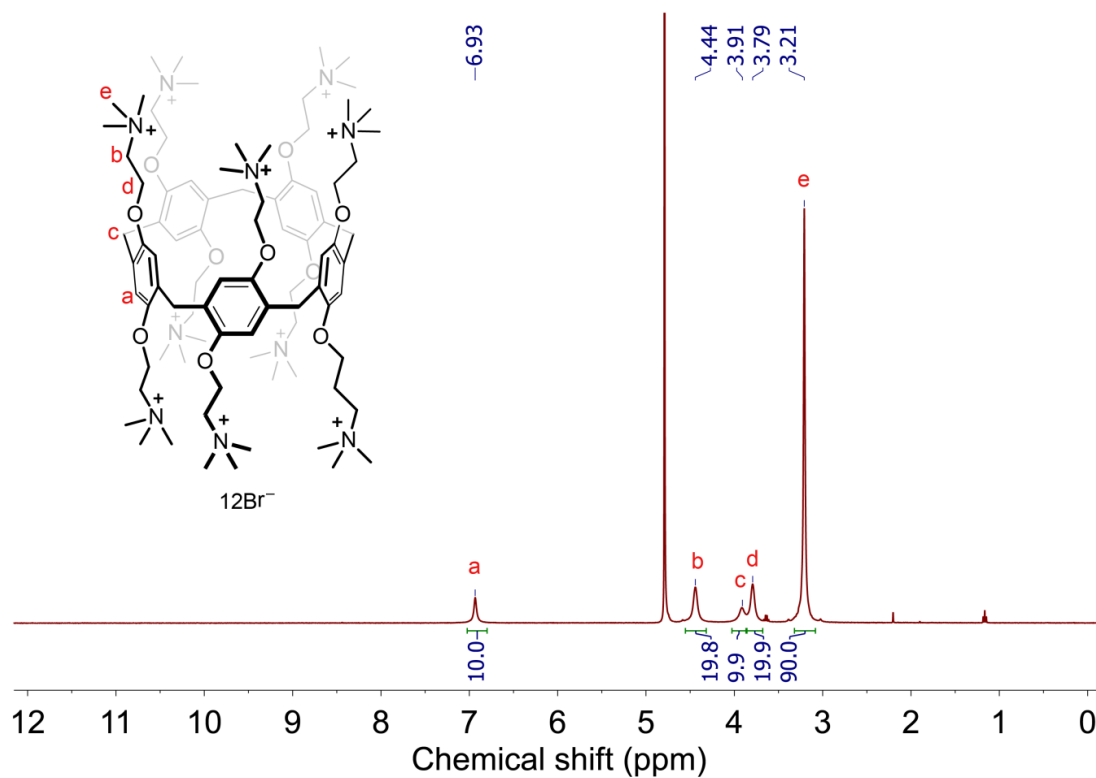

**Fig. S1**  $^1\text{H}$  NMR spectrum of  $N(\text{Me})_3^+-\text{P5}$  in  $\text{D}_2\text{O}$ .

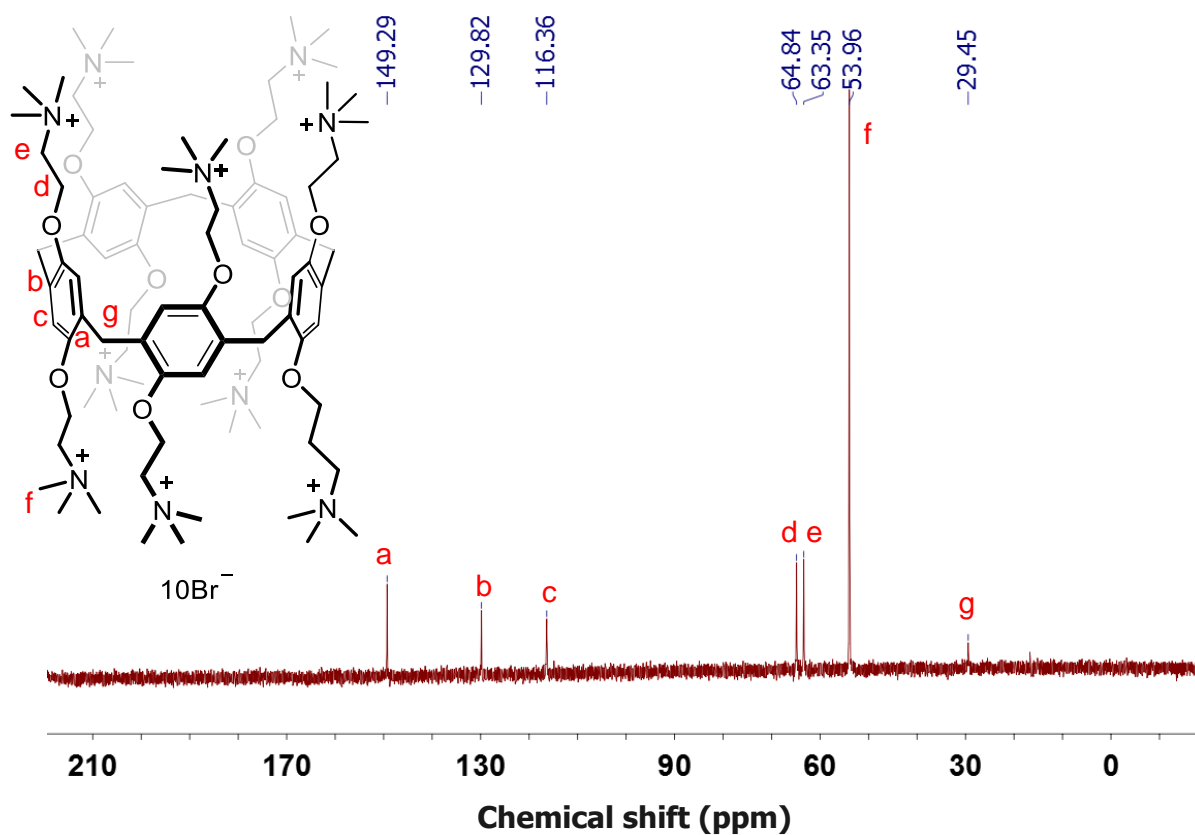

**Fig. S2**  $^{13}\text{C}$  NMR spectrum of  $N(\text{Me})_3^+-\text{P5}$  in  $\text{D}_2\text{O}$ .

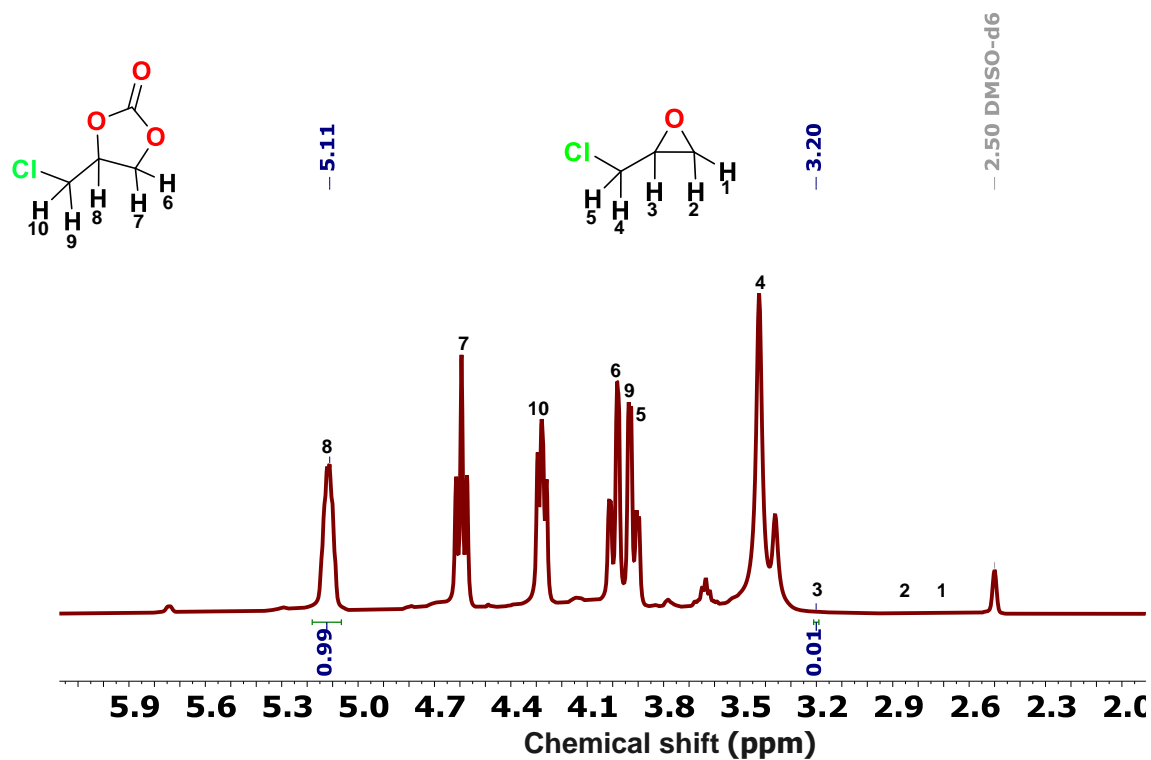

**Fig. S3**  $^1\text{H}$  NMR spectrum of ECH conversion in  $\text{DMSO-}d_6$  using  $\text{N}(\text{Me})_3^+\text{-P5}$  (0.7 mol%) at  $80\text{ }^\circ\text{C}$  and after 16 hours.

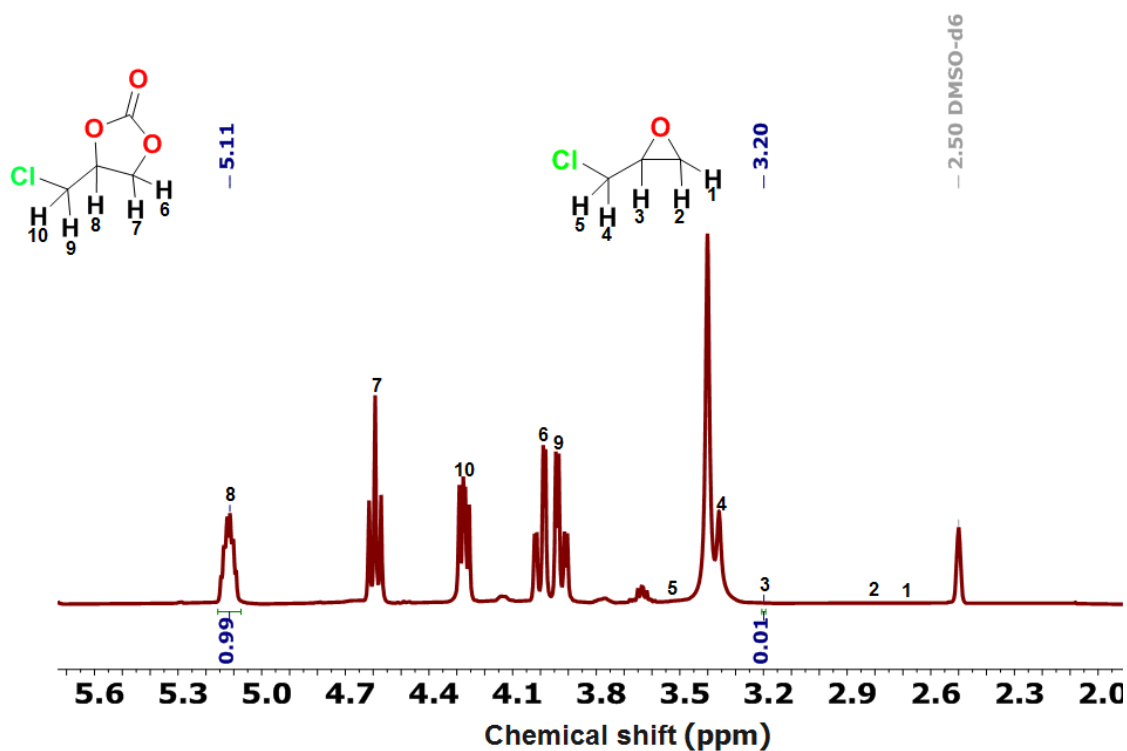

**Fig. S4**  $^1\text{H}$  NMR spectrum of ECH conversion in  $\text{DMSO-}d_6$  using  $\text{N}(\text{Me})_3^+\text{-P5}$  (0.7 mol%) at  $80\text{ }^\circ\text{C}$  and after 12 hours (Table 2, entry 1).

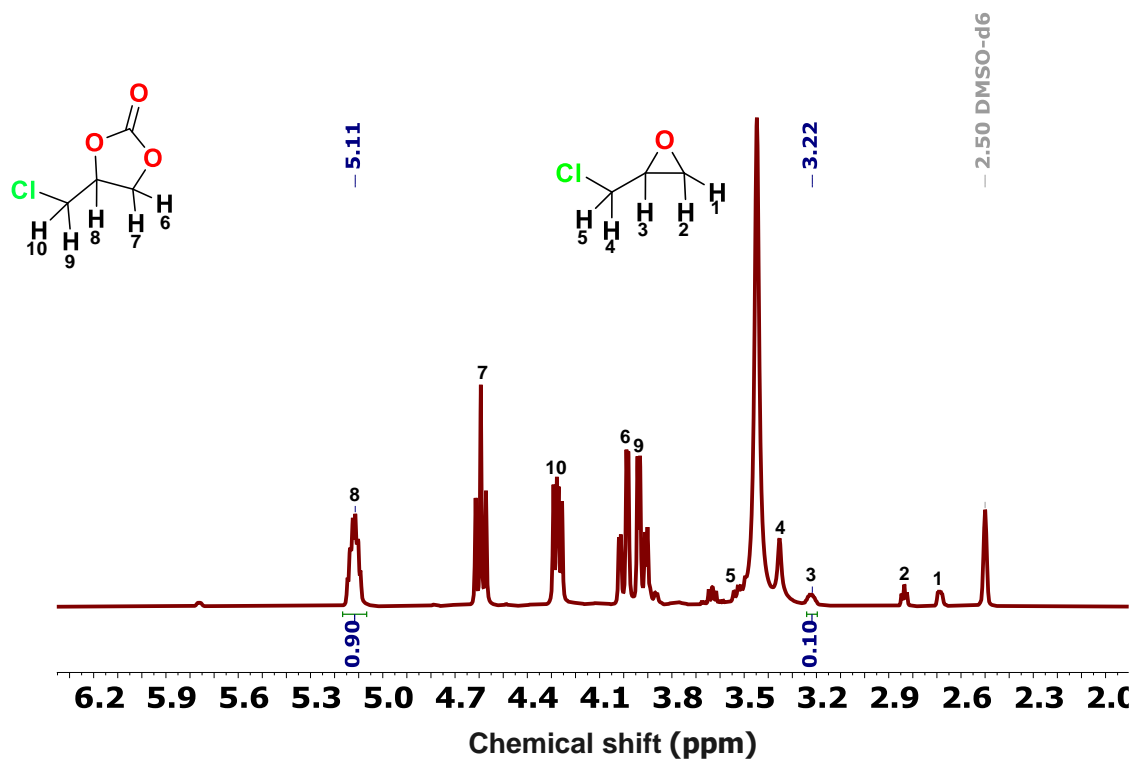

**Fig. S5**  $^1\text{H}$  NMR spectrum of ECH conversion in  $\text{DMSO-}d_6$  using  $\text{N}(\text{Me})_3^+\text{-P5}$  (0.7 mol%) at  $80^\circ\text{C}$  and after 8 hours (Table 1, entry 2).

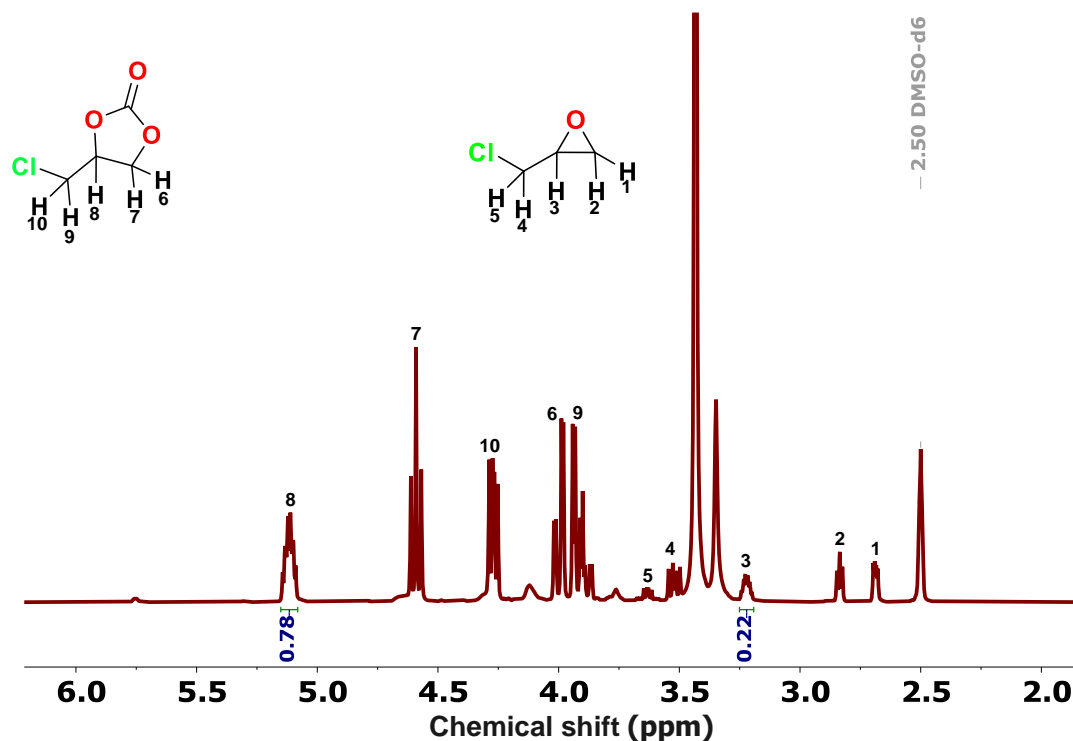

**Fig. S6**  $^1\text{H}$  NMR spectrum of ECH conversion in  $\text{DMSO-}d_6$  using  $\text{N}(\text{Me})_3^+\text{-P5}$  (0.7 mol%) at  $80^\circ\text{C}$  and after 4 hours (Table 1, entry 3).

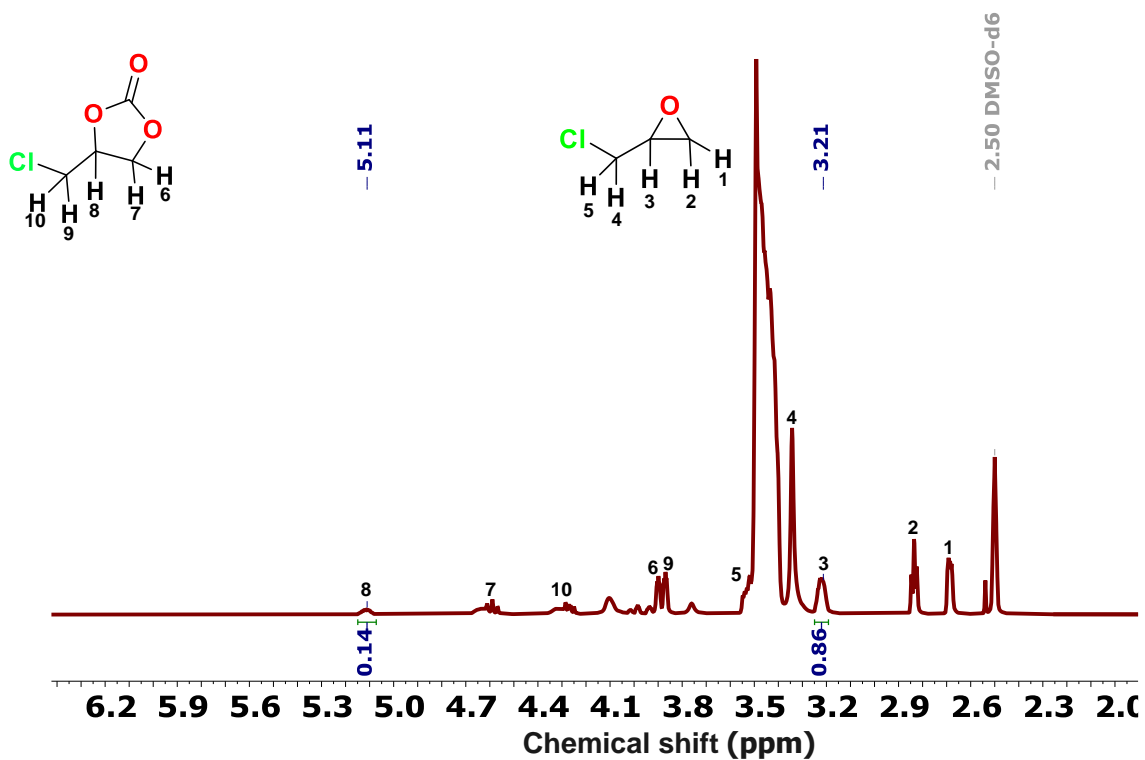

**Fig. S7**  $^1\text{H}$  NMR spectrum of ECH conversion in  $\text{DMSO-}d_6$  using  $\text{N}(\text{Me})_3^+\text{-P5}$  (0.7 mol%) at 40 °C and after 8 hours (Table 1, entry 4).

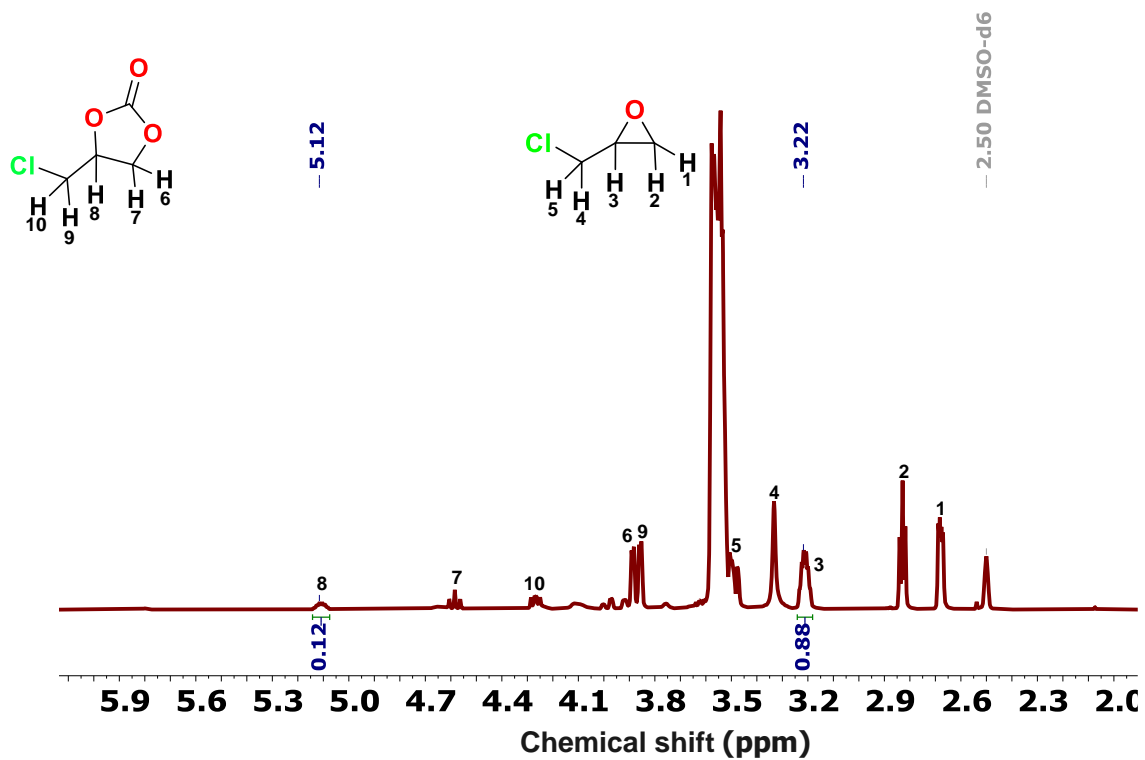

**Fig. S8**  $^1\text{H}$  NMR spectrum of ECH conversion in  $\text{DMSO-}d_6$  using  $\text{N}(\text{Me})_3^+\text{-P5}$  (0.7 mol%) at RT and after 8 hours (Table 1, entry 5).

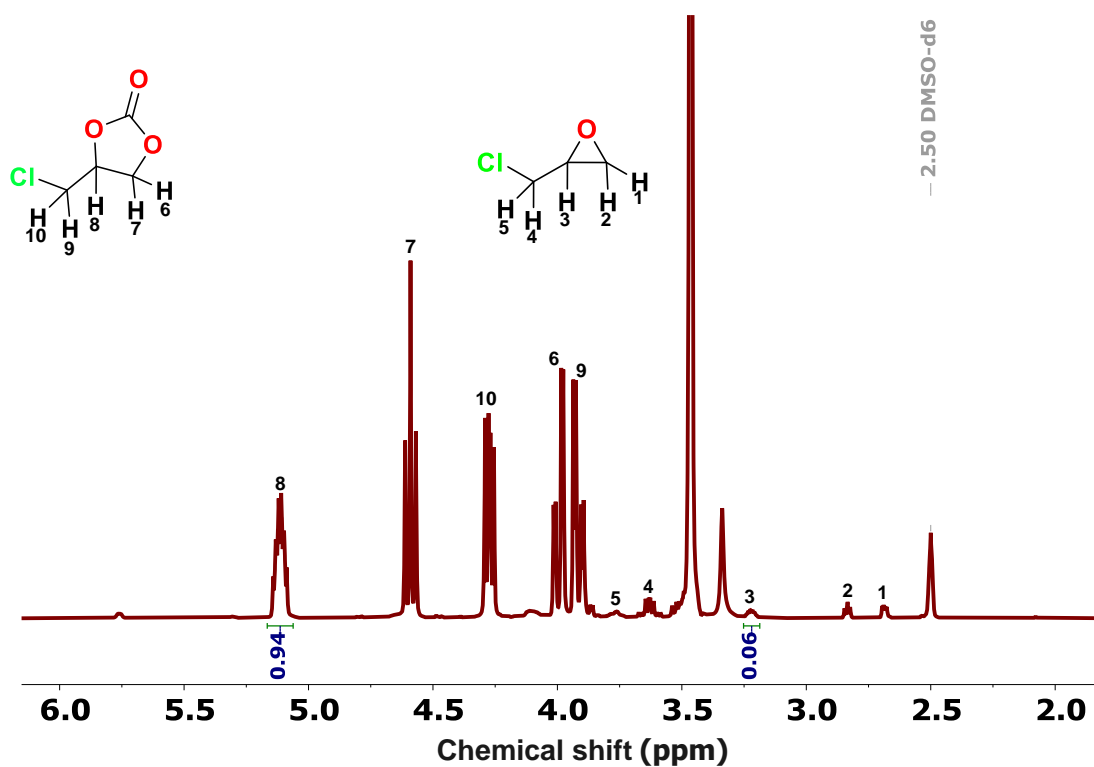

**Fig. S9.** <sup>1</sup>H NMR spectrum of ECH conversion in DMSO-*d*<sub>6</sub> using N(Me)<sub>3</sub><sup>+</sup>-P5 (0.35 mol%) at 80 °C and after 8 hours.

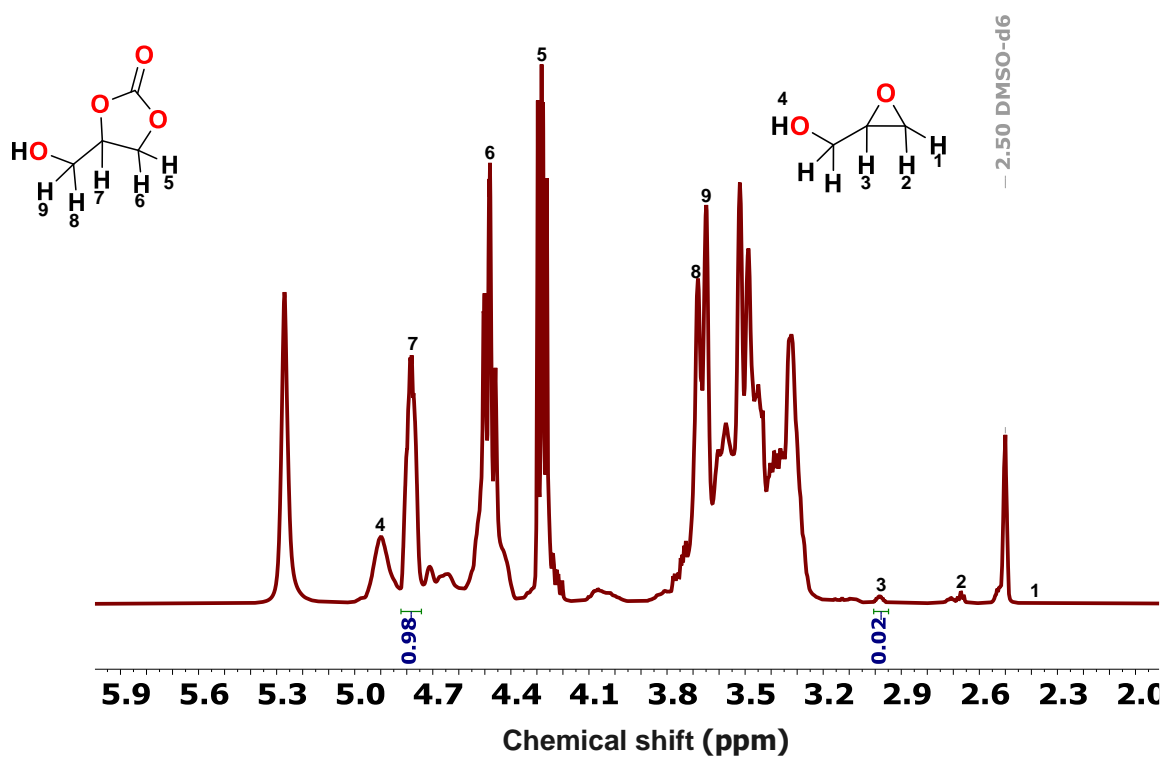

**Fig. S10** <sup>1</sup>H NMR spectrum of GO conversion in DMSO-*d*<sub>6</sub> using N(Me)<sub>3</sub><sup>+</sup>-P5 (0.7 mol%) at 80 °C and after 8 hours.

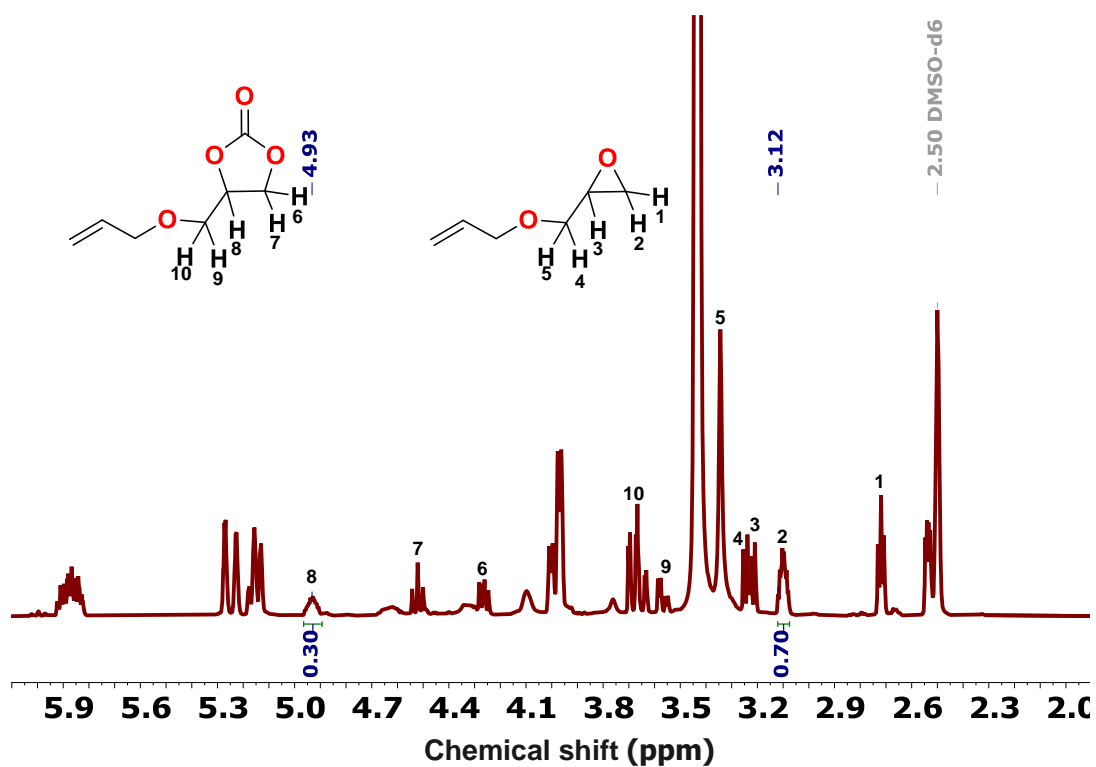

**Fig. S11**  $^1\text{H}$  NMR spectrum of AGE conversion in  $\text{DMSO-}d_6$  using  $\text{N}(\text{Me})_3^+\text{-P5}$  (0.7 mol%) at 80 °C and after 8 hours.

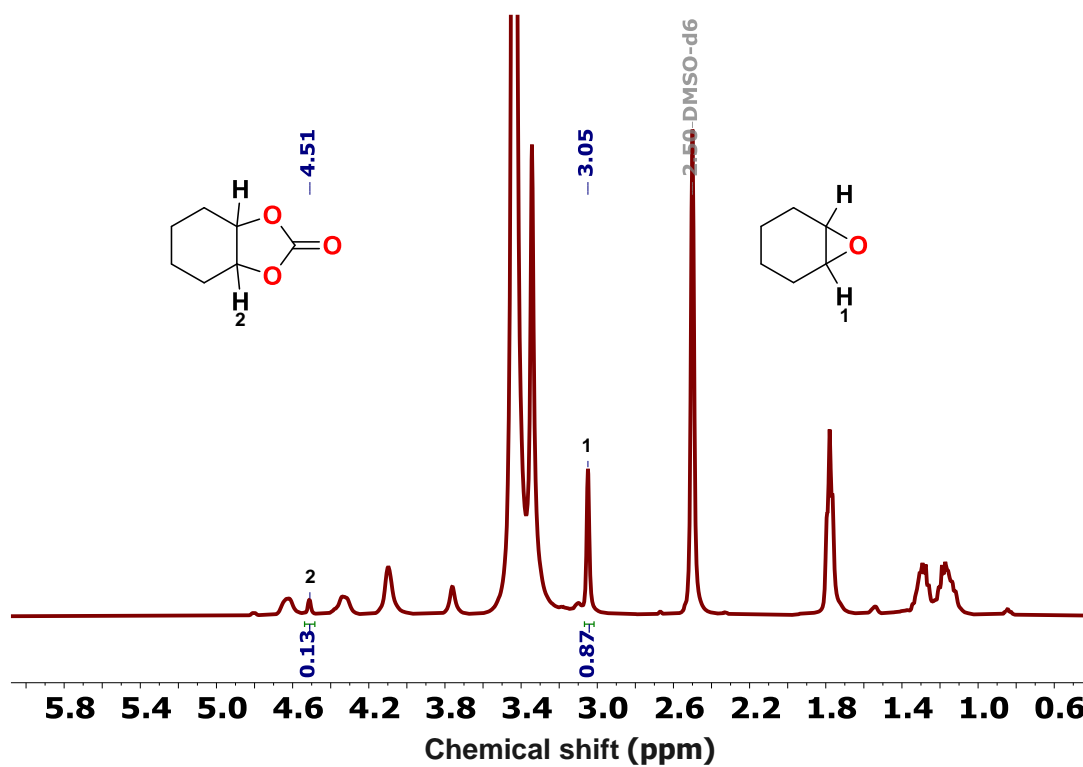

**Fig. S12**  $^1\text{H}$  NMR spectrum of CHO conversion in  $\text{DMSO-}d_6$  using  $\text{N}(\text{Me})_3^+\text{-P5}$  (0.7 mol%) at 80 °C and after 8 hours.

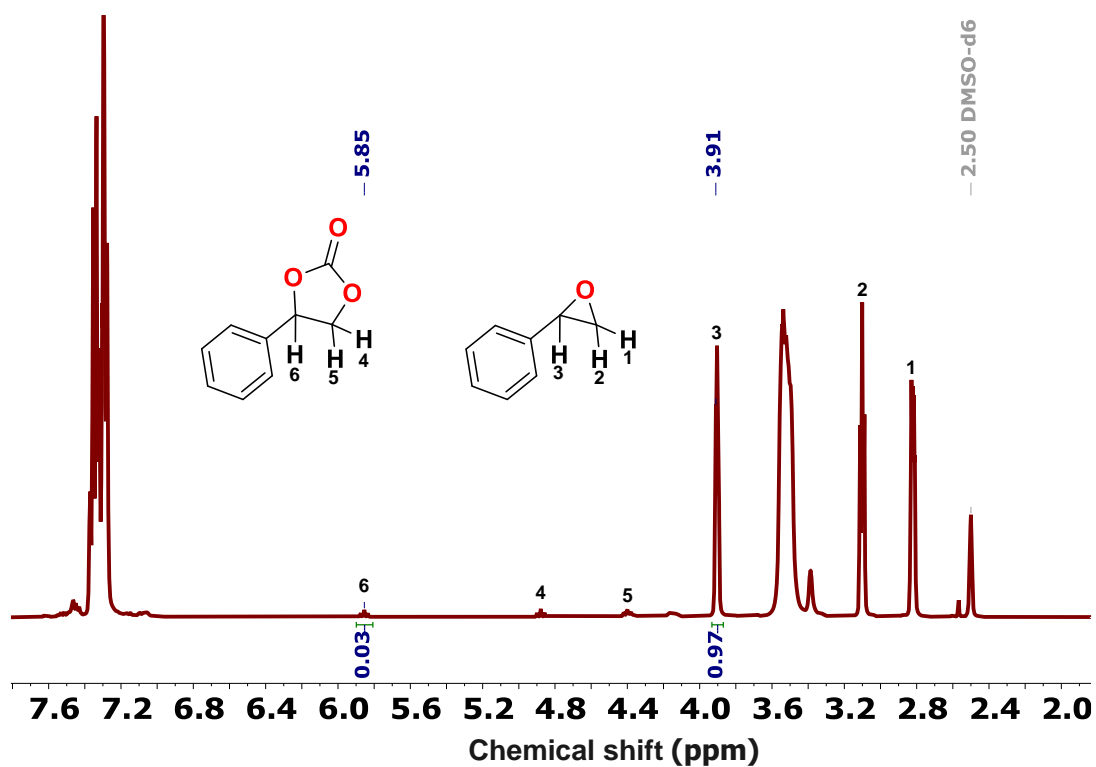

**Fig. S13**  $^1\text{H}$  NMR spectrum of SO conversion in  $\text{DMSO-}d_6$  using  $\text{N}(\text{Me})_3^+\text{-P5}$  (0.7 mol%) at  $80\text{ }^\circ\text{C}$  and after 8 hours.

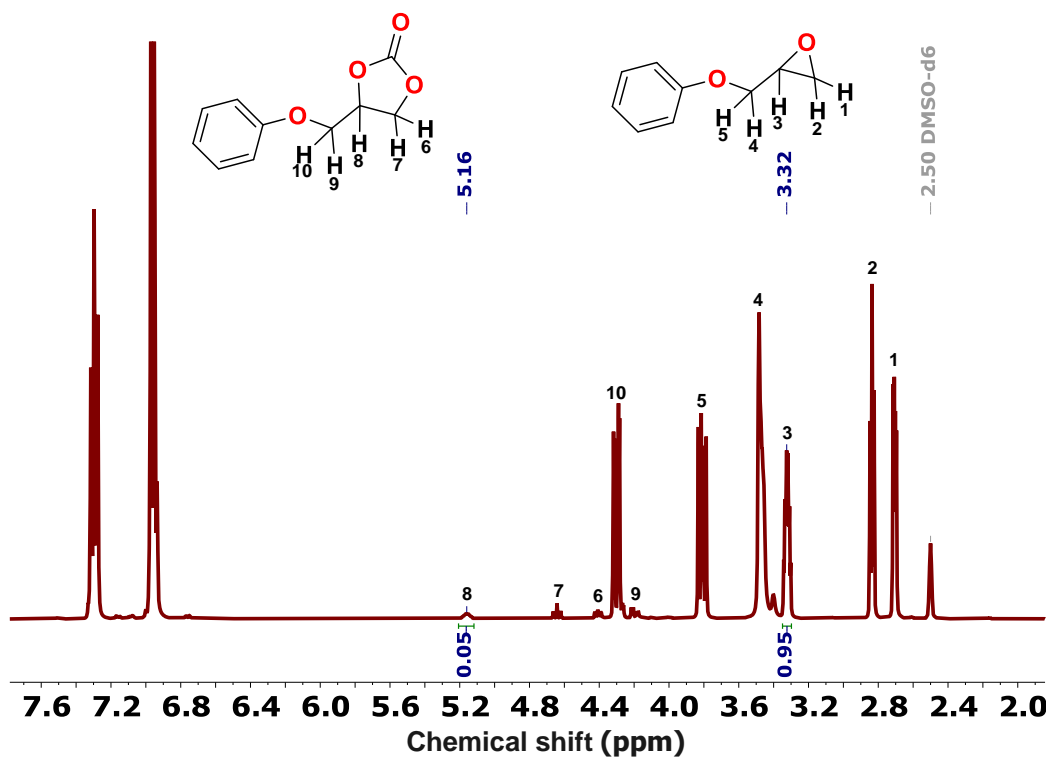

**Fig. S14**  $^1\text{H}$  NMR spectrum of EPOP conversion in  $\text{DMSO-}d_6$  using  $\text{N}(\text{Me})_3^+\text{-P5}$  (0.7 mol%) at  $80\text{ }^\circ\text{C}$  and after 8 hours.



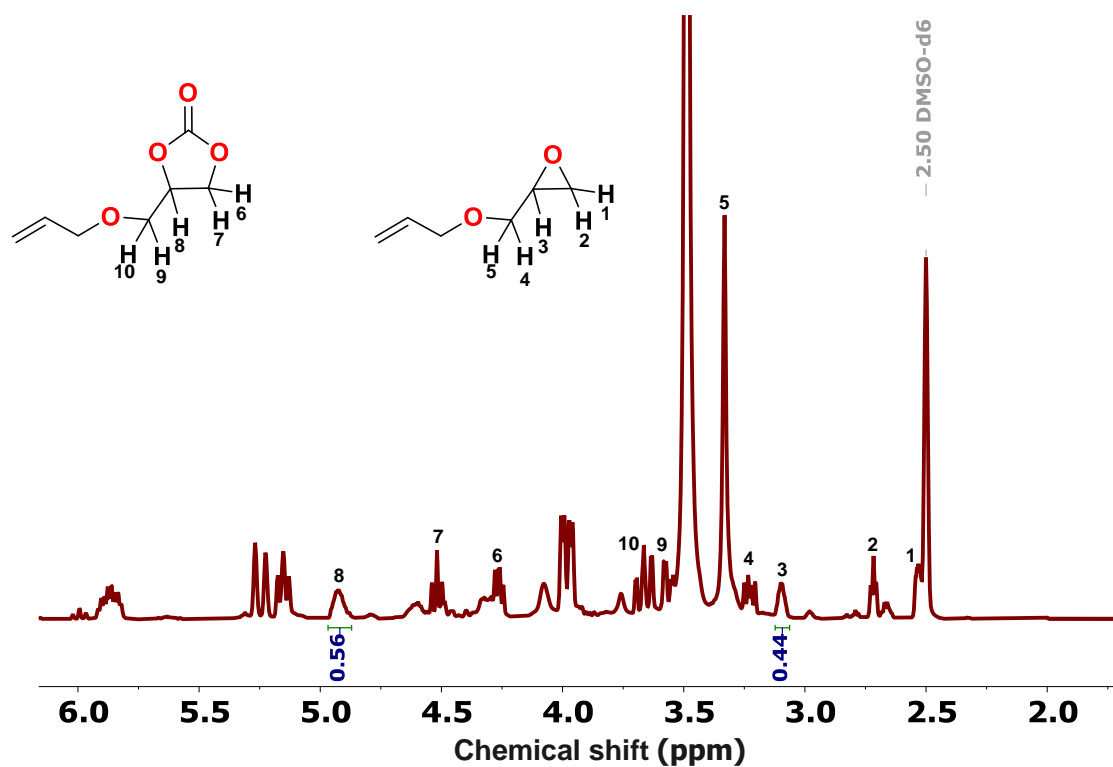

**Fig. S15**  $^1\text{H}$  NMR spectrum of AGE conversion in  $\text{DMSO-}d_6$  using  $\text{N}(\text{Me})_3^+\text{-P5}$  (0.7 mol%) at 80 °C and after 16 hours.

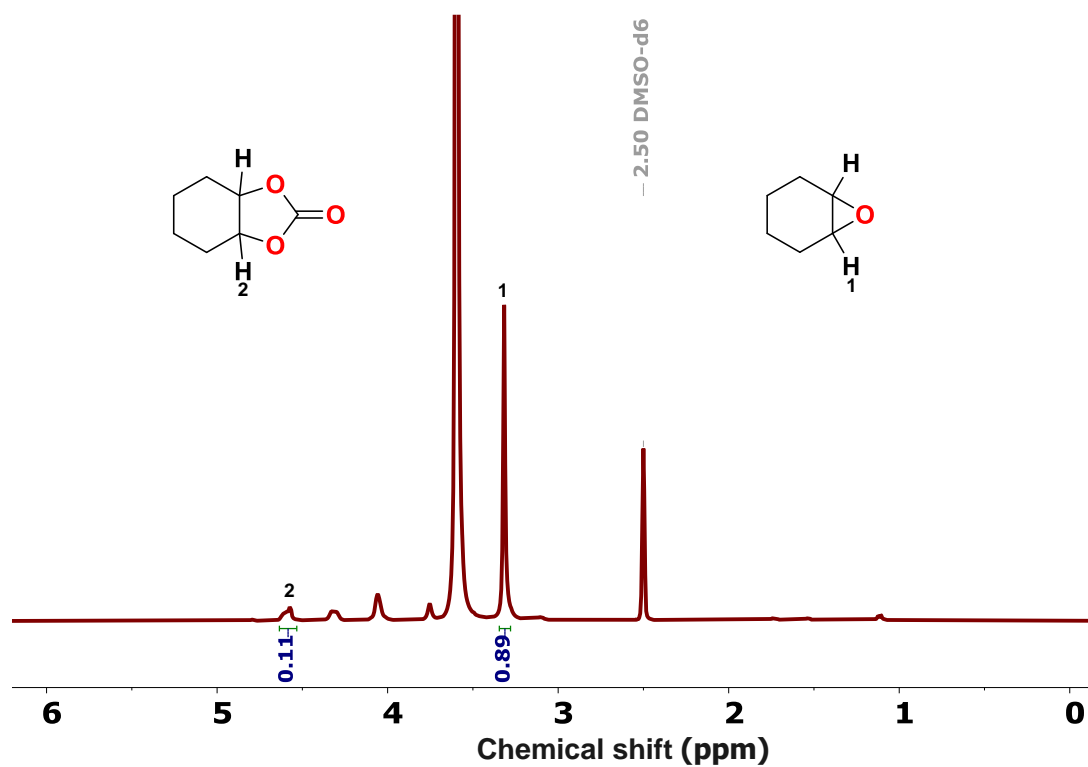

**Fig. S16**  $^1\text{H}$  NMR spectrum of CHO conversion in  $\text{DMSO-}d_6$  using  $\text{N}(\text{Me})_3^+\text{-P5}$  (0.7 mol%) at 80 °C and after 16 hours.

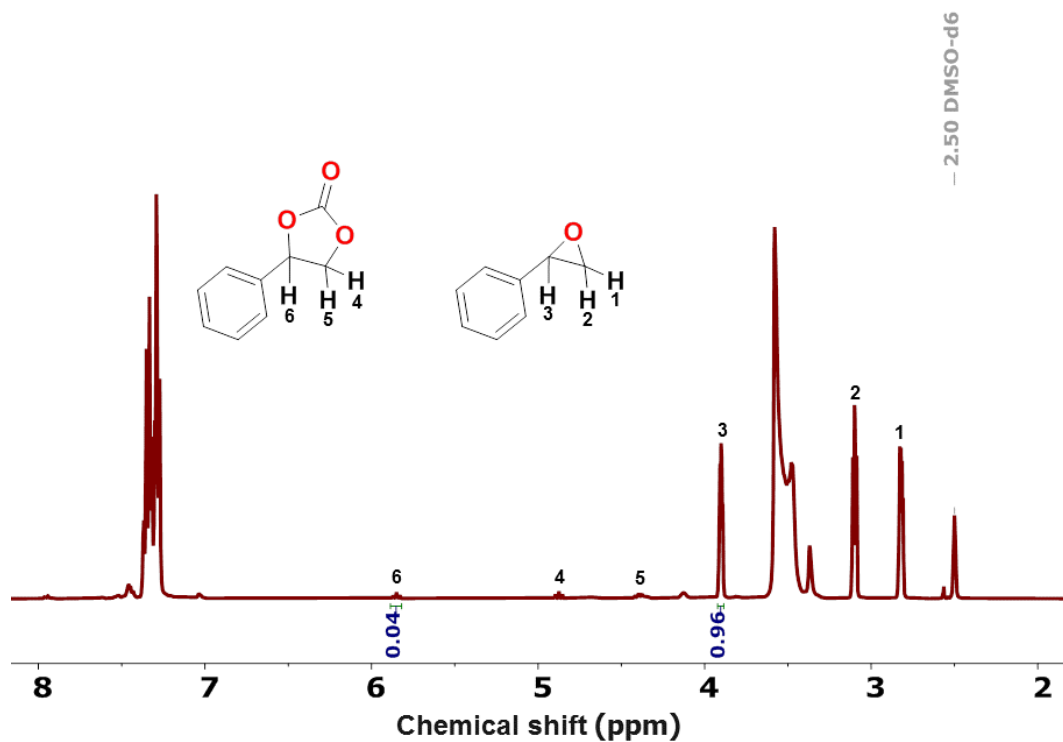

**Fig. S17**  $^1\text{H}$  NMR spectrum of SO conversion in  $\text{DMSO-}d_6$  using  $\text{N}(\text{Me})_3^+\text{-P5}$  (0.7 mol%) at  $80^\circ\text{C}$  and after 16 hours.

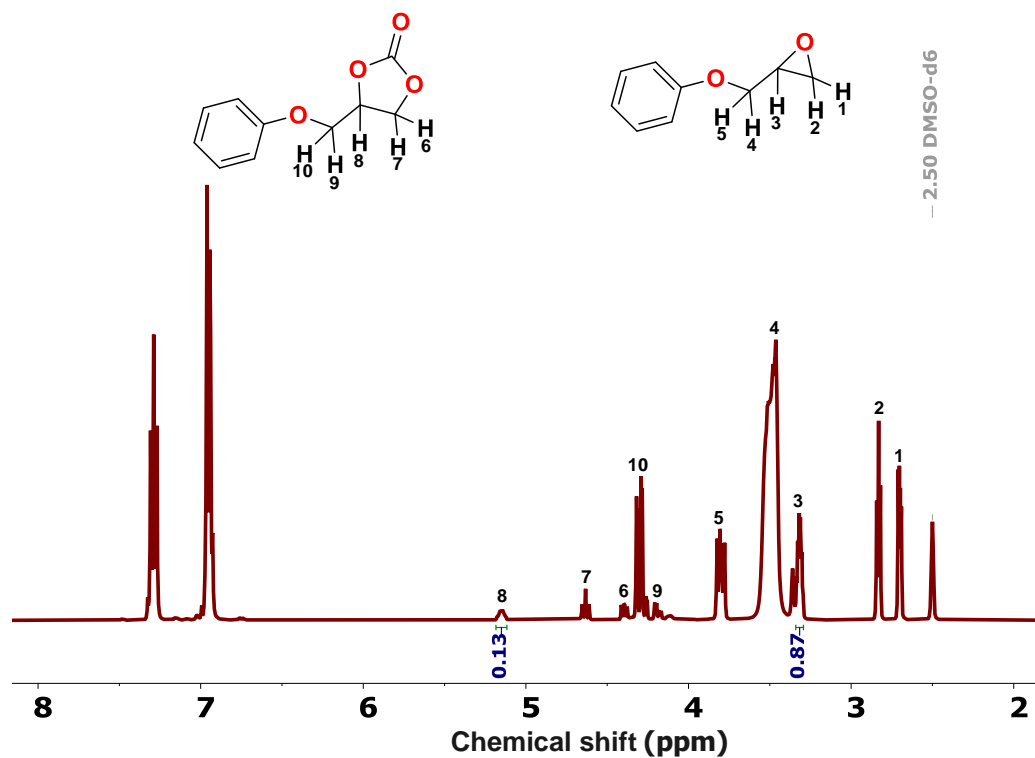

**Fig. S18**  $^1\text{H}$  NMR spectrum of EPOP conversion in  $\text{DMSO-}d_6$  using  $\text{N}(\text{Me})_3^+\text{-P5}$  (0.7 mol%) at  $80^\circ\text{C}$  and after 16 hours.

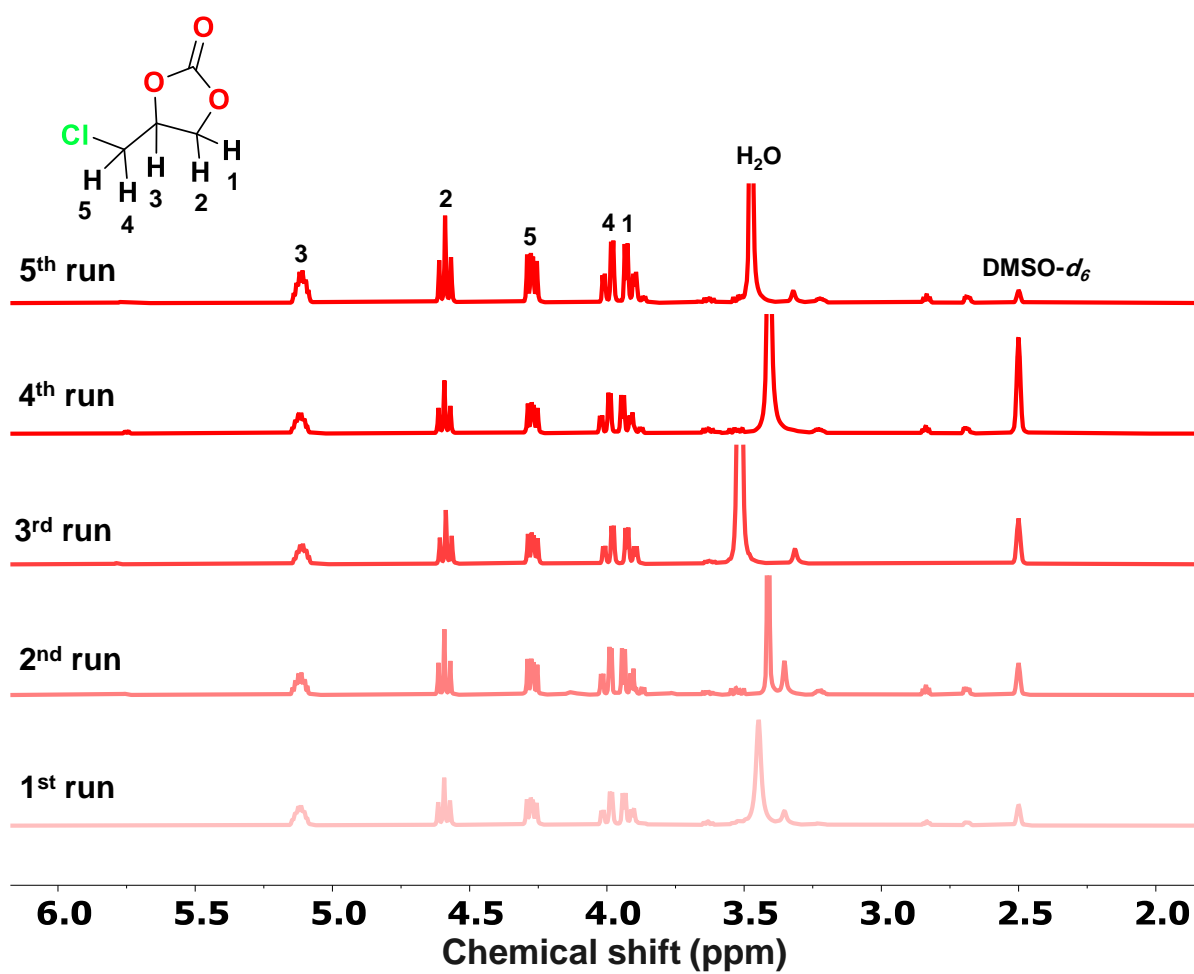

**Fig. S19** <sup>1</sup>H NMR spectra of the ECH conversion for 5 runs in testing the recyclability using  $\text{N}(\text{Me})_3^+\text{-P5}$  as a catalyst.
